# Supplementary material for: The Cobalamin-Binding Protein in Zebrafish Is an Intermediate between the Three Cobalamin-Binding Proteins in Human
Source: PubMed Central journal article supplement (PMC3331988; doi:10.1371/journal.pone.0035660), 2012-04-20
Supplement: pone.0035660.s001.pdf [file pone.0035660.s001.pdf]

**Table S1:**

| <b>TC</b>                                                                        | <b>HC</b>                                                                            | <b>IF</b>                                                                            |
|----------------------------------------------------------------------------------|--------------------------------------------------------------------------------------|--------------------------------------------------------------------------------------|
| <b>Human</b> ( <i>Homo sapiens</i> )<br>NCBI Gene ID: 6948                       | <b>Human</b> ( <i>Homo sapiens</i> )<br>NCBI Gene ID: 6947                           | <b>Human</b> ( <i>Homo sapiens</i> )<br>NCBI Gene ID: 2694                           |
| <b>Mouse</b> ( <i>Mus musculus</i> )<br>NCBI Gene ID: 21452                      |                                                                                      | <b>Mouse</b> ( <i>Mus musculus</i> )<br>NCBI Gene ID: 14603                          |
| <b>Rat</b> ( <i>Rattus norvegicus</i> )<br>NCBI Gene ID: 64365                   |                                                                                      | <b>Rat</b> ( <i>Rattus norvegicus</i> )<br>NCBI Gene ID: 29319                       |
| <b>Chimpanzee</b> ( <i>Pan troglodytes</i> )<br>NCBI Gene ID: 470178             | <b>Chimpanzee</b> ( <i>Pan troglodytes</i> )<br>NCBI Gene ID: 736117                 | <b>Chimpanzee</b> ( <i>Pan troglodytes</i> )<br>NCBI Gene ID: 451215                 |
| <b>Chicken</b> ( <i>Gallus gallus</i> )<br>NCBI Gene ID: 429737                  |                                                                                      | <b>Chicken</b> ( <i>Gallus gallus</i> )<br>NCBI Gene ID: 770547                      |
| <b>Cow</b> ( <i>Bos taurus</i> )<br>NCBI Gene ID: 281518                         | <b>Cow</b> ( <i>Bos taurus</i> )<br>NCBI Gene ID: 616239                             | <b>Cow</b> ( <i>Bos taurus</i> )<br>NCBI Gene ID: 616252                             |
| <b>Dog</b> ( <i>Canis lupus familiaris</i> )<br>NCBI Gene ID: 486355             | <b>Dog</b> ( <i>Canis lupus familiaris</i> )<br>NCBI Gene ID: 612538                 | <b>Dog</b> ( <i>Canis lupus familiaris</i> )<br>NCBI Gene ID: 449477                 |
| <b>Frog</b> ( <i>Xenopus Tropicalis</i> )<br>NCBI Gene ID: 496768                |                                                                                      | <b>Frog</b> ( <i>Xenopus Tropicalis</i> )<br>NCBI Gene ID: 100490215                 |
| <b>Hog</b> ( <i>Sus scrofa</i> )<br>NCBI Gene ID: 100152846                      | <b>Hog</b> ( <i>Sus scrofa</i> )<br>NCBI Gene ID: 396873                             | <b>Hog</b> ( <i>Sus scrofa</i> )<br>NCBI Gene ID: 100514273                          |
| <b>Gibbon</b> ( <i>Nomascus leucogenys</i> )<br>NCBI Gene ID: 100580343          | <b>Gibbon</b> ( <i>Nomascus leucogenys</i> )<br>NCBI Gene ID: 100583879              | <b>Gibbon</b> ( <i>Nomascus leucogenys</i> )<br>NCBI Gene ID: 100583542              |
| <b>Orangutan</b> ( <i>Pongo abelii</i> )<br>NCBI Gene ID: 100171681              | <b>Orangutan</b> ( <i>Pongo abelii</i> )<br>NCBI Gene ID: 100461033                  | <b>Orangutan</b> ( <i>Pongo abelii</i> )<br>NCBI Gene ID: 100460421                  |
| <b>Rhesus Macaque</b> ( <i>Macaca mulatta</i> )<br>NCBI GeneID: 716085           | <b>Rhesus Macaque</b> ( <i>Macaca mulatta</i> )<br>NCBI Gene ID: 698583              | <b>Rhesus Macaque</b> ( <i>Macaca mulatta</i> )<br>NCBI Gene ID: 698704              |
| <b>Marmoset</b> ( <i>Callithrix jacchus</i> )<br>NCBI Gene ID: 100393113         | <b>Marmoset</b> ( <i>Callithrix jacchus</i> )<br>NCBI Gene ID: 100411100             | <b>Marmoset</b> ( <i>Callithrix jacchus</i> )<br>NCBI Gene ID: 100401664             |
| <b>Horse</b> ( <i>Equus caballus</i> )<br>NCBI Gene ID: 100063639                | <b>Horse</b> ( <i>Equus caballus</i> )<br>NCBI Gene ID: 100058916                    | <b>Horse</b> ( <i>Equus caballus</i> )<br>NCBI Gene ID: 10060988                     |
| <b>Lizard</b> ( <i>Anolis carolinensis</i> )<br>NCBI Gene ID; 100480568, like    | <b>Lizard</b> ( <i>Anolis carolinensis</i> )<br>NCBI Gene ID; 100552218, like        | <b>Lizard</b> ( <i>Anolis carolinensis</i> )<br>NCBI Gene ID; 100563706, like        |
| <b>Zebrafish</b> ( <i>Danio rerio</i> )<br>GeneID: 407646, like                  | <b>Zebrafish</b> ( <i>Danio rerio</i> )<br>GeneID: 566714, like                      |                                                                                      |
| <b>Salmon</b> ( <i>Salmo salar</i> )<br>NCBI Gene ID: 100195232, like            |                                                                                      |                                                                                      |
| <b>Platypus</b> ( <i>Ornithorhynchus anatinus</i> )<br>NCBI Gene ID: 100076384   | <b>Platypus</b> ( <i>Ornithorhynchus anatinus</i> )<br>NCBI Gene ID: 100074132, like | <b>Platypus</b> ( <i>Ornithorhynchus anatinus</i> )<br>NCBI Gene ID: 100074169, like |
| <b>Rabbit</b> ( <i>Oryctolagus cuniculus</i> )<br>NCBI Gene ID: 100358905, like  | <b>Rabbit</b> ( <i>Oryctolagus cuniculus</i> )<br>NCBI Gene ID: 100356690            | <b>Rabbit</b> ( <i>Oryctolagus cuniculus</i> )<br>NCBI Gene ID: 100356172            |
| <b>Panda</b> ( <i>Ailuropoda melanoleuca</i> )<br>NCBI Gene ID: 100480568, like  | <b>Panda</b> ( <i>Ailuropoda melanoleuca</i> )<br>UCSC NM_001062, like               | <b>Panda</b> ( <i>Ailuropoda melanoleuca</i> )<br>NCBI Gene ID: 100482297, like      |
| <b>Opossum</b> ( <i>Monodelphis domestica</i> )<br>NCBI Gene ID: 100031126, like |                                                                                      | <b>Opossum</b> ( <i>Monodelphis domestica</i> )<br>NCBI Gene ID: 100028165, like     |
| <b>Sheep</b> ( <i>Ovis aries</i> )<br>UCSC NM_015749, like                       | <b>Sheep</b> ( <i>Ovis aries</i> )<br>UCSC NM_001062, like                           | <b>Sheep</b> ( <i>Ovis aries</i> )<br>UCSC NM_017162, like                           |
| <b>Guinea pig</b> ( <i>Cavia porcellus</i> )<br>UCSC NM_015749, like             | <b>Guinea pig</b> ( <i>Cavia porcellus</i> )<br>UCSC NM_001062, like                 | <b>Guinea pig</b> ( <i>Cavia porcellus</i> )<br>UCSC NM_017162, like                 |
| <b>Cat</b> ( <i>Felis catus</i> )<br>UCSC NM_015749, like                        | <b>Cat</b> ( <i>Felis catus</i> )<br>UCSC NM_001062, like                            | <b>Cat</b> ( <i>Felis catus</i> )<br>UCSC NM_017162                                  |
| <b>Elephant</b> ( <i>Loxodonta africana</i> )<br>UCSC NM_015749, like            | <b>Elephant</b> ( <i>Loxodonta africana</i> )<br>UCSC NM_001062, like                | <b>Elephant</b> ( <i>Loxodonta africana</i> )<br>UCSC NM_017162, like                |
